# Supplementary material for: Integrated transcriptome analysis identifies disease resistance genes and implicates ROP small GTPases in tomato defense against Phytophthora infestans
Source: Research Square preprint supplement (doi:10.21203/rs.3.rs-8610641/v1), 2026-02-01
Supplement: Supplementary file 1 [file 36e5a2d87e09bd6251dc79bf.docx]

**S1 9 primer sequences**

| **NO.** | **Target genes** | **Primer** | **Sequences** |
| --- | --- | --- | --- |
| 1 | Solyc01g088780.3.1 | Solyc01g088780.3.1-F | ATGTCTTCCTGCTTGCTTTCTCT |
| Solyc01g088780.3.1-R | AGGCTTTGTGTTTCCTTTTCTG |
| 2 | Solyc03g114070.3.1 | Solyc03g114070.3.1-F | CTATGTTCCGACGGTGTTTGAC |
| Solyc03g114070.3.1-R | CTTTTGCTTTTGTGGTGGCTT |
| 3 | Solyc07g020800.3.1 | Solyc07g020800.3.1-F | CTGCATGCTCATTTGTTACACCA |
| Solyc07g020800.3.1-R | TTCCTCACTACCTCCTTCCTCCTA |
| 4 | Solyc12g007210.2.1 | Solyc12g007210.2.1-F3 | GTGAATTTGGGATTATGGGA |
| Solyc12g007210.2.1-R3 | ATGATCAGCTAGATATGCGTTG |
| 5 | Solyc02g077400.4.1 | Solyc02g077400.4.1-F2 | GCGGTTGCCTACATTGAG |
| Solyc02g077400.4.1-R2 | TTTTGGGGCCTTTTCTTC |
| 6 | Solyc01g111560.3.1 | Solyc01g111560.3.1-F | ATACCAGCAACACTTTTCCCACT |
| Solyc01g111560.3.1-R | GACTTTCTCAGCTCCTCACCCT |
| 7 | Solyc02g062020.3.1 | Solyc02g062020.3.1-F | TTTCATTTTGGCATTCTCTCTCA |
| Solyc02g062020.3.1-R | TTGGGACTTCCCTTTCTTTTTC |
| 8 | Solyc02g083580.4.1 | Solyc02g083580.4.1-F | TTTCATTTTGGCATTCTCTCTCA |
| Solyc02g083580.4.1-R | GGACTTCCCCTTCTTTTTCTTCT |
| 9 | Solyc03g033420.4.1 | Solyc03g033420.4.1-F | TTTCATTTTGGCATTCTCTCTCA |
| Solyc03g033420.4.1-R | CCTTCTTTTTCTTTGTCTTGGGA |
